# Supplementary material
Source: Springer Nature journal article supplement (https://www.springermedizin.de/resource/supplementary/12936_2013_3064_MOESM5_ESM.pdf/9545022)
Supplement: MOESM5 [file 9545022]

# Unit Costs of Long-Lasting Insecticidal Net (LLIN) over Time

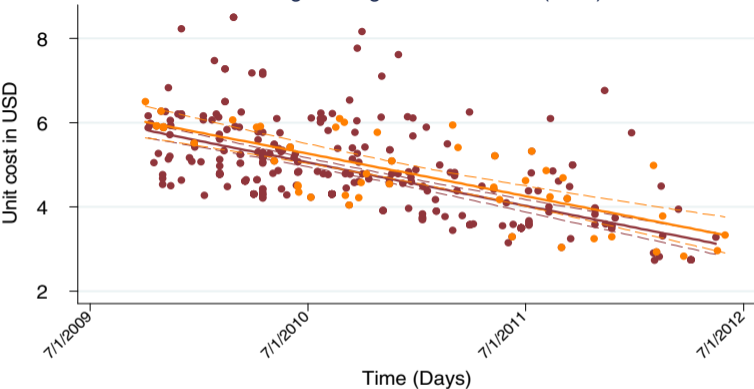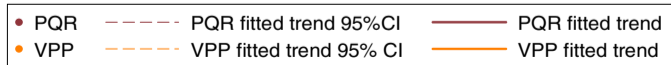

PQR Coef.=-.003 (P<.001)

PQR vs VPP (fitted trends) P=.911

VPP Coef.=-.003 (P<.001)
